# Supplementary material for: Exome-wide somatic mutation characterization of small bowel adenocarcinoma
Source: PubMed Central journal article supplement (PMC5871010; doi:10.1371/journal.pgen.1007200), 2018-03-09

**S5 Fig. AI events in the *ERBB2* and chromosome 17.** Four tumors showed a strong localized amplification in *ERBB2*, of which two tumors harbored also *ERBB2* mutation (SIA82, V842I and SIA137, S310Y).

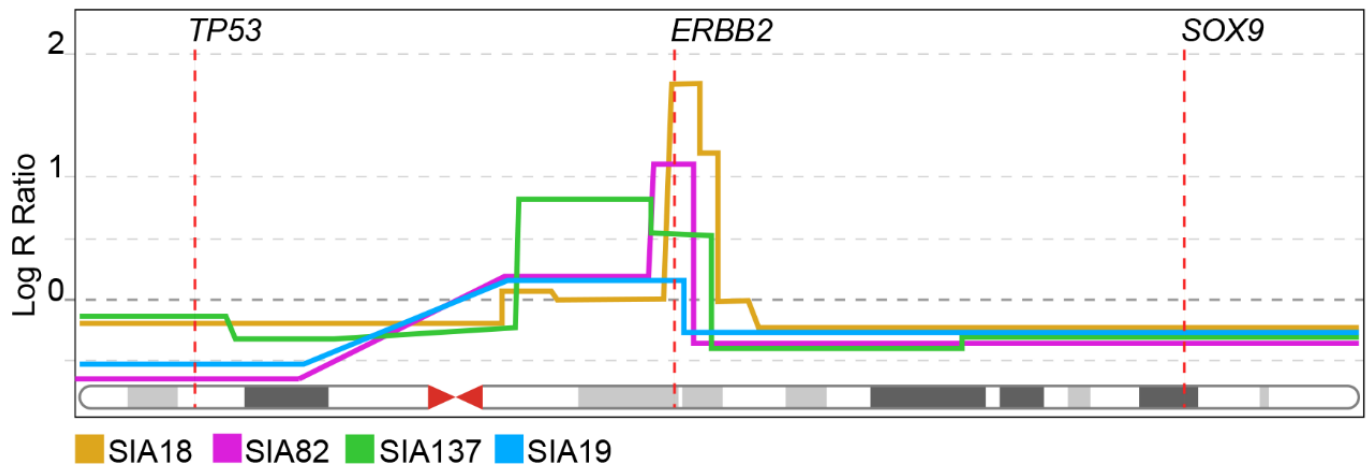

Supplement: pgen.1007200.s013.pdf [file pgen.1007200.s013.pdf]
